# Supplementary material
Source: PubMed Central journal article supplement (PMC9366654)

## Supplementary Online Content

Ahmad T, Desai NR, Yamamoto Y, et al. Alerting clinicians to 1-year mortality risk in patients hospitalized with heart failure: the REVEAL-HF randomized clinical trial. *JAMA Cardiol*. Published online August 10, 2022. doi:10.1001/jamacardio.2022.2496

**eMethods.** Creation and Performance of Mortality Risk Score

**eTable 1.** Composite Outcome by Hospital

**eTable 2.** Treatment Decisions According to Alert and Risk Levels

**eTable 3.** Clinical Opinion of Estimated Risk and Observed Mortality

**eFigure 1.** The REVEAL-HF Clinical Trial

**eFigure 2.** Interaction Between Predicted Risk Categories, Observed Rates of Mortality, and Clinician Assessment of Risk

This supplementary material has been provided by the authors to give readers additional information about their work.

## **eMethods.** Creation and Performance of Mortality Risk Score

Our derivation and validation datasets were based on patients from our health system to maximize generalizability. We analyzed data on patients admitted to the Yale New Haven Hospital between January 1, 2014, and April 14, 2018 that met the inclusion and exclusion criteria and we were not under comfort measures only or died within 36 hours of admission. This yielded 7376 unique patients on whom we performed feature selection using population-based incremental learning. First, we randomly split the data into a training set and a validation set with balanced outcomes. Second, we preprocessed the data by imputing training set medians, center and scale numeric data by training set means and SDs and clip all values at  $\pm 10$  for numeric stability. Finally, we fit a logistic regression model on the training set and evaluate the area under the curve on the validation set to gauge the performance of the feature set. We set the number of features considered to 15 for ease of implementation. We choose the 15 features with the highest probabilities after 500 iterations using a population size of 1,000. The final model was a logistic regression fit on the full dataset after performing similar preprocessing as before, except using statistics from the full dataset. The model's coefficients were finally transformed to work with the original feature centers and scales. The variables included in the final risk score were as follows: age, weight, systolic blood pressure, red cell distribution width, blood urea nitrogen, monocyte count, lymphocyte percentage, blood urea nitrogen-to-creatinine ratio, troponin, NT-proBNP, mean corpuscular volume, intensive care unit admission, and measurement of arterial pH. A variable for patients who were on comfort measures was in the initial risk score "codecomfort" and was removed, leaving 14 variables in total. The model achieved an area

under the curve of  $0.742 \pm 0.01$  on the full dataset. The model achieved an area under the curve of  $0.738 \pm 0.02$  on the clinical trial dataset which was similar to its discrimination performance in the derivation and validation dataset.

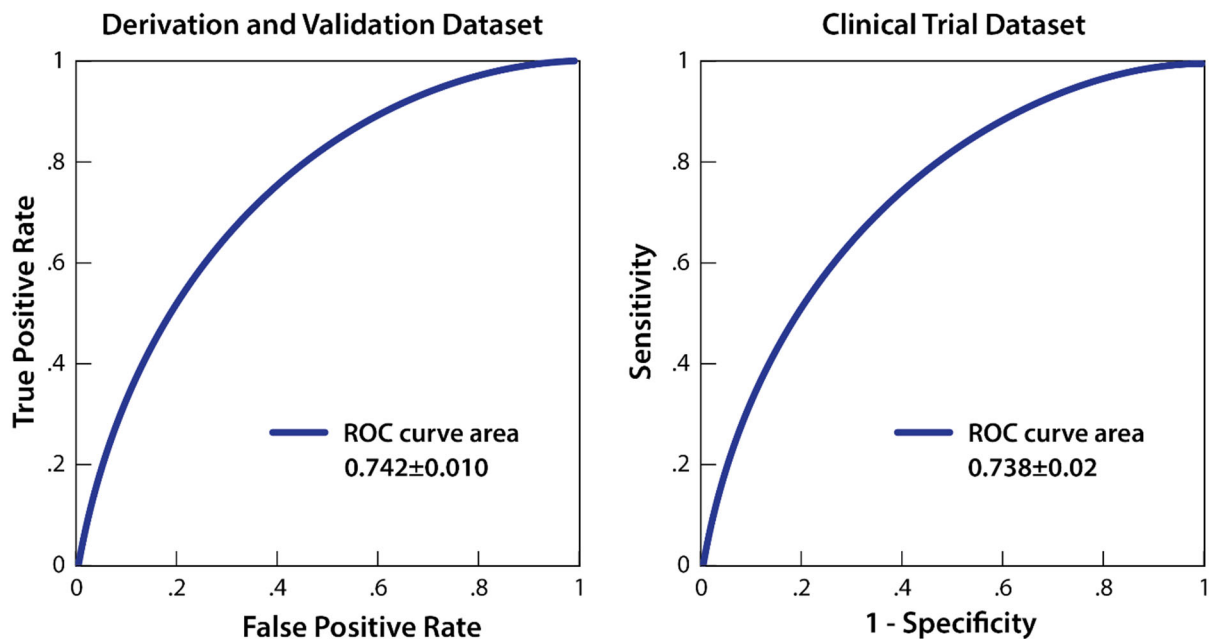

To measure the calibration of our risk score, we partitioned the space of predicted event rates/probabilities into 23 consecutive bins, constructed such that each bin contains just over 500 of the model's predicted probabilities. Using the mean of observed events within each bin, we estimate the true within-bin event rates and construct 95% confident intervals using the normal approximation to the binomial distribution. The plot below compares these estimates (y-axis) against the model's within-bin mean predicted probabilities, demonstrating excellent calibration. During the study period, we observed persistently higher rates of mortality than predicted by the algorithm during the clinical trial period, resulting in worse calibration compared with the derivation dataset. Excluding COVID+ patients did not meaningfully change either the discrimination of calibration of our model. However, given the higher rates of adverse outcomes during this time period, we hypothesized that our findings might be related to changes in cohort

characteristics during the COVID pandemic and the associated excess burden of heart failure deaths.

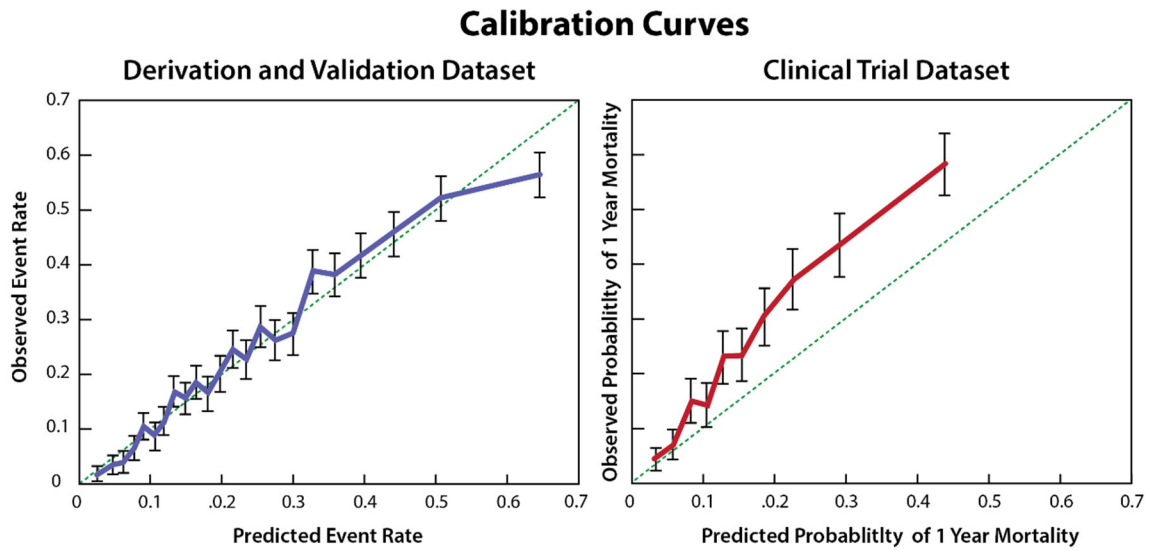

**eTable 1.** Composite Outcome by Hospital

| Hospital | Alert Group     | Usual Care      | OR                |
|----------|-----------------|-----------------|-------------------|
| YNNH     | 300/769 (39.0%) | 314/742 (42.3%) | 0.87 [0.71, 1.07] |
| SRC      | 160/389 (41.1%) | 133/360 (36.9%) | 1.19 [0.89, 1.60] |
| BH       | 106/279 (38.0%) | 112/283 (39.6%) | 0.94 [0.67, 1.31] |
| GH       | 53/153 (34.6%)  | 44/149 (29.5%)  | 1.26 [0.78, 2.05] |

**eTable 2.** Treatment Decisions According to Alert and Risk Levels

|                                 | Alert             | No Alert          | Risk difference (CI) |
|---------------------------------|-------------------|-------------------|----------------------|
| <b>ACE-I/ARB/ARNI</b>           | 766/1590 (48.18%) | 738/1534 (48.11%) | 0.1 (-3.4 to 3.6)    |
| Very Low Risk                   | 321/425 (75.53%)  | 283/360 (78.61%)  |                      |
| Low Risk                        | 349/752 (46.41%)  | 348/770 (45.19%)  |                      |
| Medium Risk                     | 77/307 (25.08%)   | 88/319 (27.59%)   |                      |
| High Risk                       | 17/96 (17.71%)    | 19/77 (24.68%)    |                      |
| Very High Risk                  | 2/10 (20%)        | 0/8 (0%)          |                      |
| <b>Beta Blocker</b>             | 1307/1590 (82.2%) | 1264/1534 (82.4%) | -0.2 (-2.9 to 2.4)   |
| Very Low Risk                   | 380/425 (89.41%)  | 320/360 (88.89%)  |                      |
| Low Risk                        | 616/752 (81.91%)  | 634/770 (82.34%)  |                      |
| Medium Risk                     | 224/307 (72.96%)  | 250/319 (78.37%)  |                      |
| High Risk                       | 78/96 (81.25%)    | 56/77 (72.73%)    |                      |
| Very High Risk                  | 9/10 (90%)        | 4/8 (50%)         |                      |
| <b>MRA</b>                      | 376/1590 (23.65%) | 385/1534 (25.1%)  | -1.4 (-4.4 to 1.6)   |
| Very Low Risk                   | 140/425 (32.94%)  | 126/360 (35%)     |                      |
| Low Risk                        | 167/752 (22.21%)  | 172/770 (22.34%)  |                      |
| Medium Risk                     | 49/307 (15.96%)   | 76/319 (23.82%)   |                      |
| High Risk                       | 19/96 (19.79%)    | 10/77 (12.99%)    |                      |
| Very High Risk                  | 1/10 (10%)        | 1/8 (12.5%)       |                      |
| <b>SGLT2i</b>                   | 138/1590 (8.68%)  | 134/1534 (8.74%)  | -0.7 (-2.6 to 1.2)   |
| Very Low Risk                   | 65/425 (15.29%)   | 59/360 (16.39%)   |                      |
| Low Risk                        | 54/752 (7.18%)    | 53/770 (6.88%)    |                      |
| Medium Risk                     | 14/307 (4.56%)    | 18/319 (5.64%)    |                      |
| High Risk                       | 4/96 (4.17%)      | 3/77 (3.9%)       |                      |
| Very High Risk                  | 1/10 (10%)        | 1/8 (12.5%)       |                      |
| <b>ICD Implantation</b>         | 19/1590 (1.19%)   | 21/1534 (1.37%)   | -0.2 (-0.9 to 0.6)   |
| Very Low Risk                   | 2/425 (0.47%)     | 7/360 (1.94%)     |                      |
| Low Risk                        | 11/752 (1.46%)    | 11/770 (1.43%)    |                      |
| Medium Risk                     | 4/307 (1.3%)      | 2/319 (0.63%)     |                      |
| High Risk                       | 2/96 (2.08%)      | 1/77 (1.3%)       |                      |
| Very High Risk                  | 0/10 (0%)         | 0/8 (0%)          |                      |
| <b>Palliative Care Referral</b> | 163/1590 (10.25%) | 164/1534 (10.69%) | 0.02 (-2.1 to 2.1)   |

|                |                 |                 |  |
|----------------|-----------------|-----------------|--|
| Very Low Risk  | 14/425 (3.29%)  | 8/360 (2.22%)   |  |
| Low Risk       | 71/752 (9.44%)  | 72/770 (9.35%)  |  |
| Medium Risk    | 59/307 (19.22%) | 62/319 (19.44%) |  |
| High Risk      | 15/96 (15.63%)  | 18/77 (23.38%)  |  |
| Very High Risk | 4/10 (40%)      | 4/8 (50%)       |  |

**eTable 3.** Clinical Opinion of Estimated Risk and Observed Mortality

| <b>Risk Level</b> | <b>Clinician's Opinion</b>        | <b>Result</b>      |
|-------------------|-----------------------------------|--------------------|
| Very Low Risk     | Risk assessment seems too low     | 8.9% [5.6, 13.3]   |
| Very Low Risk     | Risk assessment seems appropriate | 8.3% [6.8, 10.0]   |
| Very Low Risk     | Risk assessment seems too high    | 13.0% [5.4, 24.9]  |
| Low Risk          | Risk assessment seems too low     | 31.6% [27.0, 36.5] |
| Low Risk          | Risk assessment seems appropriate | 26.7% [24.9, 28.5] |
| Low Risk          | Risk assessment seems too high    | 25.0% [17.8, 33.4] |
| Medium Risk       | Risk assessment seems too low     | 46.8% [40.4, 53.4] |
| Medium Risk       | Risk assessment seems appropriate | 48.2% [45.4, 51.0] |
| Medium Risk       | Risk assessment seems too high    | 37.3% [27.0, 48.7] |
| High Risk         | Risk assessment seems too low     | 81.4% [70.3, 89.7] |
| High Risk         | Risk assessment seems appropriate | 68.7% [64.1, 73.0] |
| High Risk         | Risk assessment seems too high    | 64.5% [45.4, 80.1] |
| Very High Risk    | Risk assessment seems too low     | 100% [66.4, 100]   |
| Very High Risk    | Risk assessment seems appropriate | 88.5% [77.8, 95.3] |
| Very High Risk    | Risk assessment seems too high    | 66.7% [9.4, 99.2]  |

**eFigure 1.** The REVEAL-HF Clinical Trial

The study included all adults  $\geq 18$  years who had an NT-proBNP levels of  $>500$  pg/mL and received intravenous loop diuretics within 24 hours of admission. In the intervention arm, an alert displaying the predicted 1-year mortality rate, as well as other relevant information, was displayed to clinicians when they opened the “order entry” portion of the medical record

### The REVeAL-HF Clinical Trial

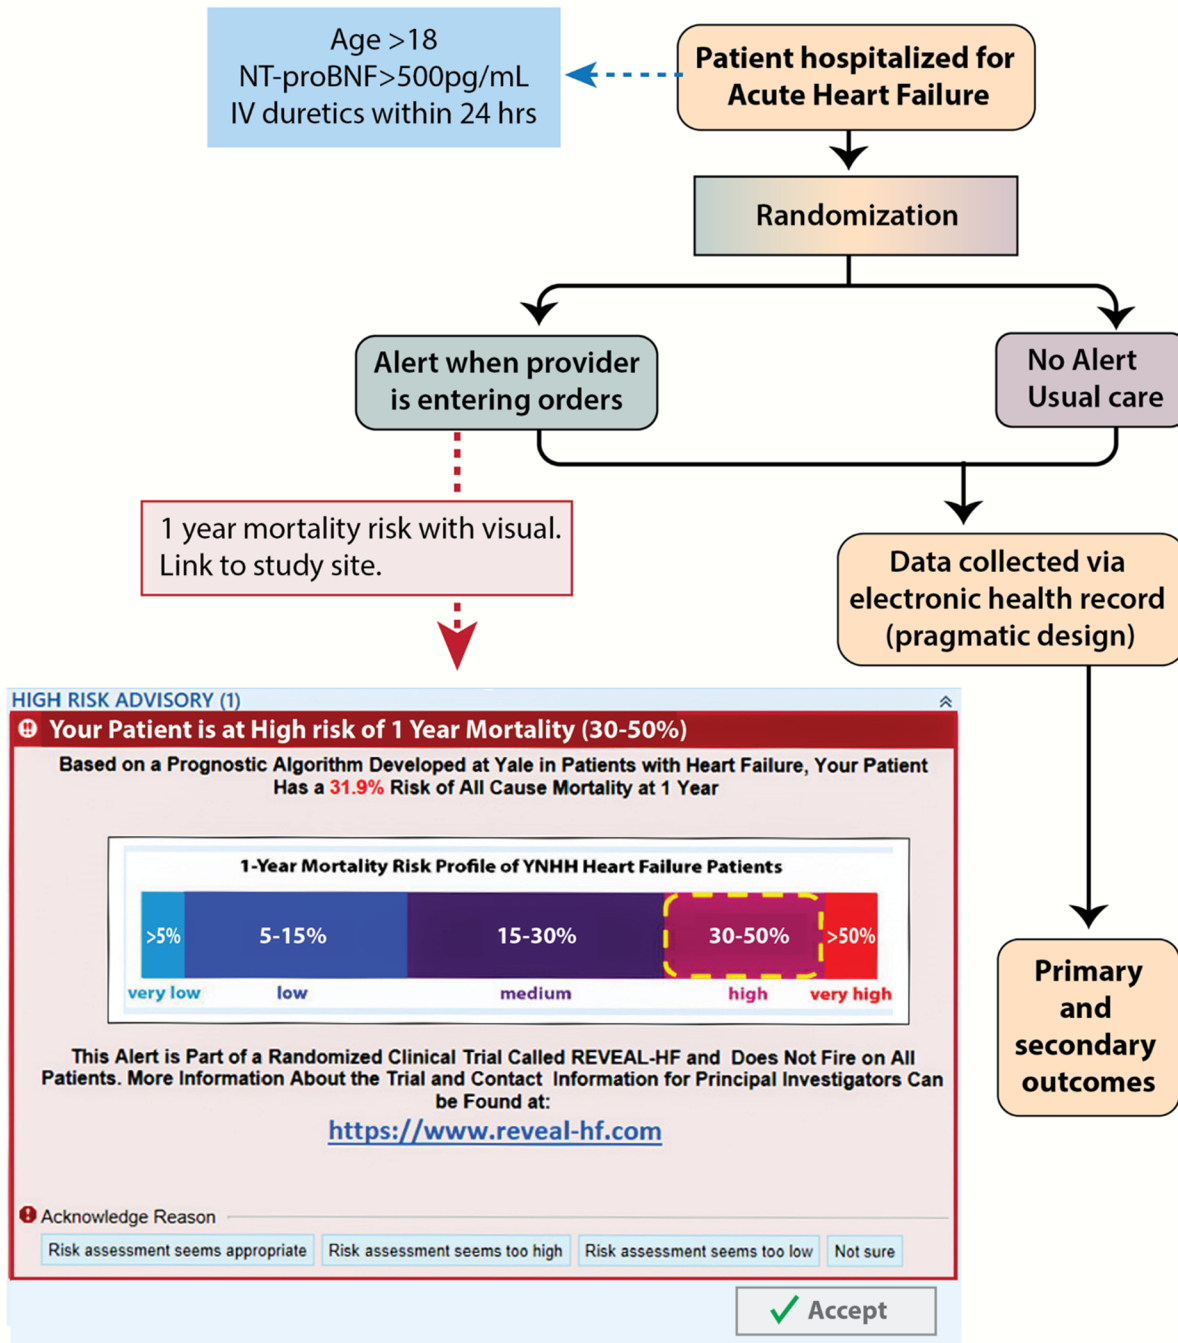

**eFigure 2.** Interaction Between Predicted Risk Categories, Observed Rates of Mortality, and Clinician Assessment of Risk

As predicted risk increases (X-axis), observed mortality increases. Within each predicted risk category, we assessed the impact of physician input to evaluate whether physician intuition accurately sub-stratified individuals within predicted risk categories.

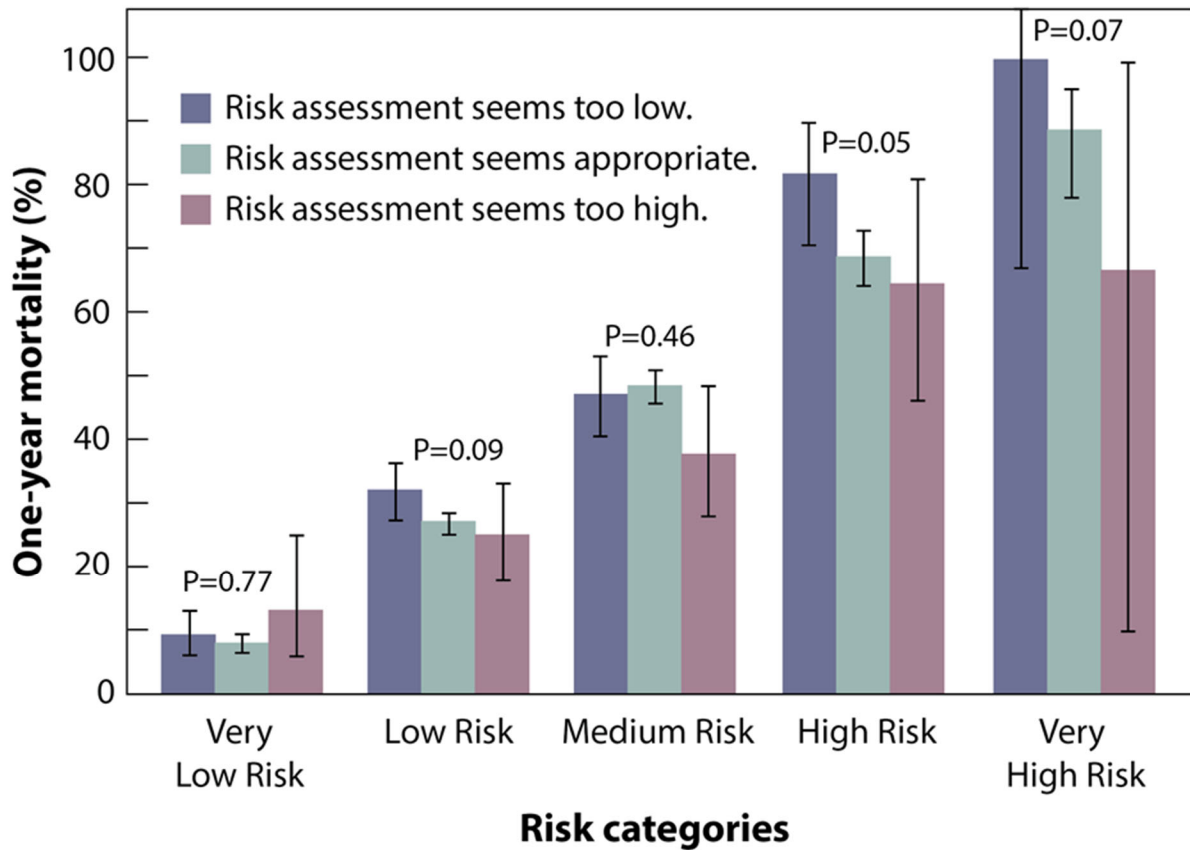

Supplement: jamacardiol-e222496-s002.pdf [file jamacardiol-e222496-s002.pdf]
