# Supplementary material
Source: PubMed Central journal article supplement (PMC9366654)
Supplement: jamacardiol-e222496-s003.pdf [file jamacardiol-e222496-s003.pdf]

## Data Sharing Statement

Ahmad. Alerting Clinicians to 1-Year Mortality Risk in Patients Hospitalized With Heart Failure. *JAMA Cardiol.* Published August 10, 2022. doi:10.1001/jamacardio.2022.2496

### Data

**Data available:** Yes

**Data types:** Deidentified participant data

**How to access data:** [francis.p.wilson@yale.edu](mailto:francis.p.wilson@yale.edu)

**When available:** With publication

### Supporting Documents

**Document types:** Statistical/analytic code, Informed consent form

**How to access documents:** Uploaded

**When available:** With publication

### Additional Information

**Who can access the data:** Researchers with proposal

**Types of analyses:** any purpose

**Mechanisms of data availability:** after approval of proposal.
